# Supplementary material for: Lymph-node-targeted, mKRAS-specific amphiphile vaccine in pancreatic and colorectal cancer: the phase 1 AMPLIFY-201 trial
Source: Springer Nature journal article supplement (doi:10.1038/s41591-023-02760-3), 2024-01-09
Supplement: MOESM1 [file 41591_2023_2760_MOESM1_ESM.pdf]

# **Lymph-node-targeted, mKRAS-specific amphiphile vaccine in pancreatic and colorectal cancer: the phase 1 AMPLIFY-201 trial**

---

In the format provided by the  
authors and unedited

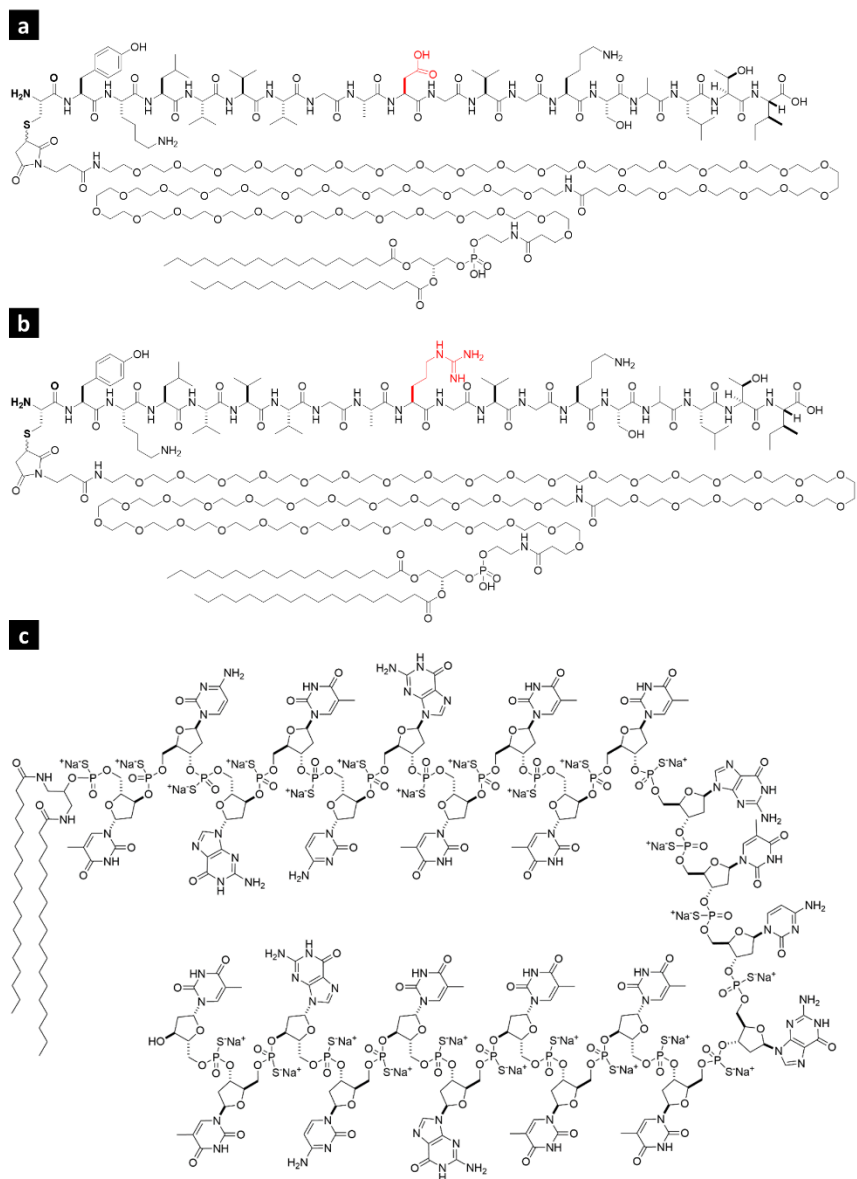

**Supplementary Figure 1: Chemical structures for ELI-002 2P components.**

Chemical structures for a, Amph-Peptide G12D, b, Amph-Peptide G12R, and c, Amph-CpG-7909. Amino acid side chains for G12D and G12R shown in red.

| Peptide Name    | Peptide Sequence   | Peptide Length |
|-----------------|--------------------|----------------|
| G12D Long       | YKLVVVGADGVGKSALTI | 18             |
| G12D Short 9-1  | YKLVVVGAD          | 9              |
| G12D Short 9-2  | KLVVVGADG          | 9              |
| G12D Short 9-3  | LVVVGADGV          | 9              |
| G12D Short 9-4  | VVVGADGVG          | 9              |
| G12D Short 9-5  | VVGADGVGK          | 9              |
| G12D Short 9-6  | VGADGVGKS          | 9              |
| G12D Short 9-7  | GADGVGKSA          | 9              |
| G12D Short 9-8  | ADGVGKSAL          | 9              |
| G12D Short 9-9  | DGVGKSALT          | 9              |
| G12D Short 10-1 | YKLVVVGADG         | 10             |
| G12D Short 10-2 | KLVVVGADGV         | 10             |
| G12D Short 10-3 | LVVVGADGVG         | 10             |
| G12D Short 10-4 | VVVGADGVGK         | 10             |
| G12D Short 10-5 | VVGADGVGKS         | 10             |
| G12D Short 10-6 | VGADGVGKSA         | 10             |
| G12D Short 10-7 | GADGVGKSAL         | 10             |
| G12D Short 10-8 | ADGVGKSALT         | 10             |
| G12D Short 10-9 | DGVGKSALTI         | 10             |

| Peptide Name    | Peptide Sequence   | Peptide Length |
|-----------------|--------------------|----------------|
| G12V Long       | YKLVVVGAVGVGKSALTI | 18             |
| G12V Short 9-1  | YKLVVVGAV          | 9              |
| G12V Short 9-2  | KLVVVGAVG          | 9              |
| G12V Short 9-3  | LVVVGAVGV          | 9              |
| G12V Short 9-4  | VVVGAVGVG          | 9              |
| G12V Short 9-5  | VVGAVGVGK          | 9              |
| G12V Short 9-6  | VGAVGVGKS          | 9              |
| G12V Short 9-7  | GAVGVGKSA          | 9              |
| G12V Short 9-8  | AVGVGKSAL          | 9              |
| G12V Short 9-9  | VGVGKSALT          | 9              |
| G12V Short 10-1 | YKLVVVGAVG         | 10             |
| G12V Short 10-2 | KLVVVGAVGV         | 10             |
| G12V Short 10-3 | LVVVGAVGVG         | 10             |
| G12V Short 10-4 | VVVGAVGVGK         | 10             |
| G12V Short 10-5 | VVGAVGVGKS         | 10             |
| G12V Short 10-6 | VGAVGVGKSA         | 10             |
| G12V Short 10-7 | GAVGVGKSAL         | 10             |
| G12V Short 10-8 | AVGVGKSALT         | 10             |
| G12V Short 10-9 | VGVGKSALTI         | 10             |

| Peptide Name    | Peptide Sequence   | Peptide Length |
|-----------------|--------------------|----------------|
| G12R Long       | YKLVVVGARGVGKSALTI | 18             |
| G12R Short 9-1  | YKLVVVGAR          | 9              |
| G12R Short 9-2  | KLVVVGARG          | 9              |
| G12R Short 9-3  | LVVVGARGV          | 9              |
| G12R Short 9-4  | VVVGARGVG          | 9              |
| G12R Short 9-5  | VVGARGVGK          | 9              |
| G12R Short 9-6  | VGARGVGKS          | 9              |
| G12R Short 9-7  | GARGVGKSA          | 9              |
| G12R Short 9-8  | ARGVGKSAL          | 9              |
| G12R Short 9-9  | RGVGKSALT          | 9              |
| G12R Short 10-1 | YKLVVVGARG         | 10             |
| G12R Short 10-2 | KLVVVGARGV         | 10             |
| G12R Short 10-3 | LVVVGARGVG         | 10             |
| G12R Short 10-4 | VVVGARGVGK         | 10             |
| G12R Short 10-5 | VVGARGVGKS         | 10             |
| G12R Short 10-6 | VGARGVGKSA         | 10             |
| G12R Short 10-7 | GARGVGKSAL         | 10             |
| G12R Short 10-8 | ARGVGKSALT         | 10             |
| G12R Short 10-9 | RGVGKSALTI         | 10             |

| Peptide Name    | Peptide Sequence   | Peptide Length |
|-----------------|--------------------|----------------|
| G12A Long       | YKLVVVGAAGVGKSALTI | 18             |
| G12A Short 9-1  | YKLVVVGAAG         | 9              |
| G12A Short 9-2  | KLVVVGAAG          | 9              |
| G12A Short 9-3  | LVVVGAAGV          | 9              |
| G12A Short 9-4  | VVVGAAGVG          | 9              |
| G12A Short 9-5  | VVGAAGVGK          | 9              |
| G12A Short 9-6  | VGAAGVGKS          | 9              |
| G12A Short 9-7  | GAAGVGKSA          | 9              |
| G12A Short 9-8  | AAGVGKSAL          | 9              |
| G12A Short 9-9  | AGVGKSALT          | 9              |
| G12A Short 10-1 | YKLVVVGAAG         | 10             |
| G12A Short 10-2 | KLVVVGAAGV         | 10             |
| G12A Short 10-3 | LVVVGAAGVG         | 10             |
| G12A Short 10-4 | VVVGAAGVGK         | 10             |
| G12A Short 10-5 | VVGAAGVGKS         | 10             |
| G12A Short 10-6 | VGAAGVGKSA         | 10             |
| G12A Short 10-7 | GAAGVGKSAL         | 10             |
| G12A Short 10-8 | AAGVGKSALT         | 10             |
| G12A Short 10-9 | AGVGKSALTI         | 10             |

| Peptide Name    | Peptide Sequence   | Peptide Length |
|-----------------|--------------------|----------------|
| G12S Long       | YKLVVVGASGVGKSALTI | 18             |
| G12S Short 9-1  | YKLVVVGAS          | 9              |
| G12S Short 9-2  | KLVVVGASG          | 9              |
| G12S Short 9-3  | LVVVGASGV          | 9              |
| G12S Short 9-4  | VVVGASGVG          | 9              |
| G12S Short 9-5  | VVGASGVGK          | 9              |
| G12S Short 9-6  | VGASGVGKS          | 9              |
| G12S Short 9-7  | GASGVGKSA          | 9              |
| G12S Short 9-8  | ASGVGKSAL          | 9              |
| G12S Short 9-9  | SGVGKSALT          | 9              |
| G12S Short 10-1 | YKLVVVGASG         | 10             |
| G12S Short 10-2 | KLVVVGASGV         | 10             |
| G12S Short 10-3 | LVVVGASGVG         | 10             |
| G12S Short 10-4 | VVVGASGVGK         | 10             |
| G12S Short 10-5 | VVGASGVGKS         | 10             |
| G12S Short 10-6 | VGASGVGKSA         | 10             |
| G12S Short 10-7 | GASGVGKSAL         | 10             |
| G12S Short 10-8 | ASGVGKSALT         | 10             |
| G12S Short 10-9 | SGVGKSALTI         | 10             |

| Peptide Name    | Peptide Sequence   | Peptide Length |
|-----------------|--------------------|----------------|
| G12C Long       | YKLVVVGACGVGKSALTI | 18             |
| G12C Short 9-1  | YKLVVVGAC          | 9              |
| G12C Short 9-2  | KLVVVGACG          | 9              |
| G12C Short 9-3  | LVVVGACGV          | 9              |
| G12C Short 9-4  | VVVGACGVG          | 9              |
| G12C Short 9-5  | VVGACGVGK          | 9              |
| G12C Short 9-6  | VGACGVGKS          | 9              |
| G12C Short 9-7  | GACGVGKSA          | 9              |
| G12C Short 9-8  | ACGVGKSAL          | 9              |
| G12C Short 9-9  | CGVGKSALT          | 9              |
| G12C Short 10-1 | YKLVVVGACG         | 10             |
| G12C Short 10-2 | KLVVVGACGV         | 10             |
| G12C Short 10-3 | LVVVGACGVG         | 10             |
| G12C Short 10-4 | VVVGACGVGK         | 10             |
| G12C Short 10-5 | VVGACGVGKS         | 10             |
| G12C Short 10-6 | VGACGVGKSA         | 10             |
| G12C Short 10-7 | GACGVGKSAL         | 10             |
| G12C Short 10-8 | ACGVGKSALT         | 10             |
| G12C Short 10-9 | CGVGKSALTI         | 10             |

| Peptide Name    | Peptide Sequence   | Peptide Length |
|-----------------|--------------------|----------------|
| G13D Long       | YKLVVVGAGDVGKSALTI | 18             |
| G13D Short 9-1  | KLVVVGAGD          | 9              |
| G13D Short 9-2  | LVVVVGAGDV         | 9              |
| G13D Short 9-3  | VVVVGAGDVG         | 9              |
| G13D Short 9-4  | VVGAGDVGK          | 9              |
| G13D Short 9-5  | VGAGDVGKS          | 9              |
| G13D Short 9-6  | GAGDVGKSA          | 9              |
| G13D Short 9-7  | AGDVGKSAL          | 9              |
| G13D Short 9-8  | GDVGKSALT          | 9              |
| G13D Short 9-9  | DVGKSALTI          | 9              |
| G13D Short 10-1 | YKLVVVGAGD         | 10             |
| G13D Short 10-2 | KLVVVGAGDV         | 10             |
| G13D Short 10-3 | LVVVVGAGDVG        | 10             |
| G13D Short 10-4 | VVVVGAGDVGK        | 10             |
| G13D Short 10-5 | VVGAGDVGKS         | 10             |
| G13D Short 10-6 | VGAGDVGKSA         | 10             |
| G13D Short 10-7 | GAGDVGKSAL         | 10             |
| G13D Short 10-8 | AGDVGKSALT         | 10             |
| G13D Short 10-9 | GDVGKSALTI         | 10             |

| Peptide Name  | Peptide Sequence   | Peptide Length |
|---------------|--------------------|----------------|
| WT Long       | YKLVVVGAGGVGKSALTI | 18             |
| WT Short 9-1  | YKLVVVGAG          | 9              |
| WT Short 9-2  | KLVVVGAGG          | 9              |
| WT Short 9-3  | LVVVGAGGV          | 9              |
| WT Short 9-4  | VVVGAGGVG          | 9              |
| WT Short 9-5  | VVGAGGVGK          | 9              |
| WT Short 9-6  | VGAGGVGKS          | 9              |
| WT Short 9-7  | GAGGVGKSA          | 9              |
| WT Short 9-8  | AGGVGKSAL          | 9              |
| WT Short 9-9  | GGVGKSALT          | 9              |
| WT Short 9-10 | GVGKSALTI          | 9              |
| WT Short 10-1 | YKLVVVGAGG         | 10             |
| WT Short 10-2 | KLVVVGAGGV         | 10             |
| WT Short 10-3 | LVVVGAGGVG         | 10             |
| WT Short 10-4 | VVVGAGGVGK         | 10             |
| WT Short 10-5 | VVGAGGVGKS         | 10             |
| WT Short 10-6 | VGAGGVGKSA         | 10             |
| WT Short 10-7 | GAGGVGKSAL         | 10             |
| WT Short 10-8 | AGGVGKSALT         | 10             |
| WT Short 10-9 | GGVGKSALTI         | 10             |

**Supplementary Table 1: Stimulation peptides used for immunogenicity analysis.**

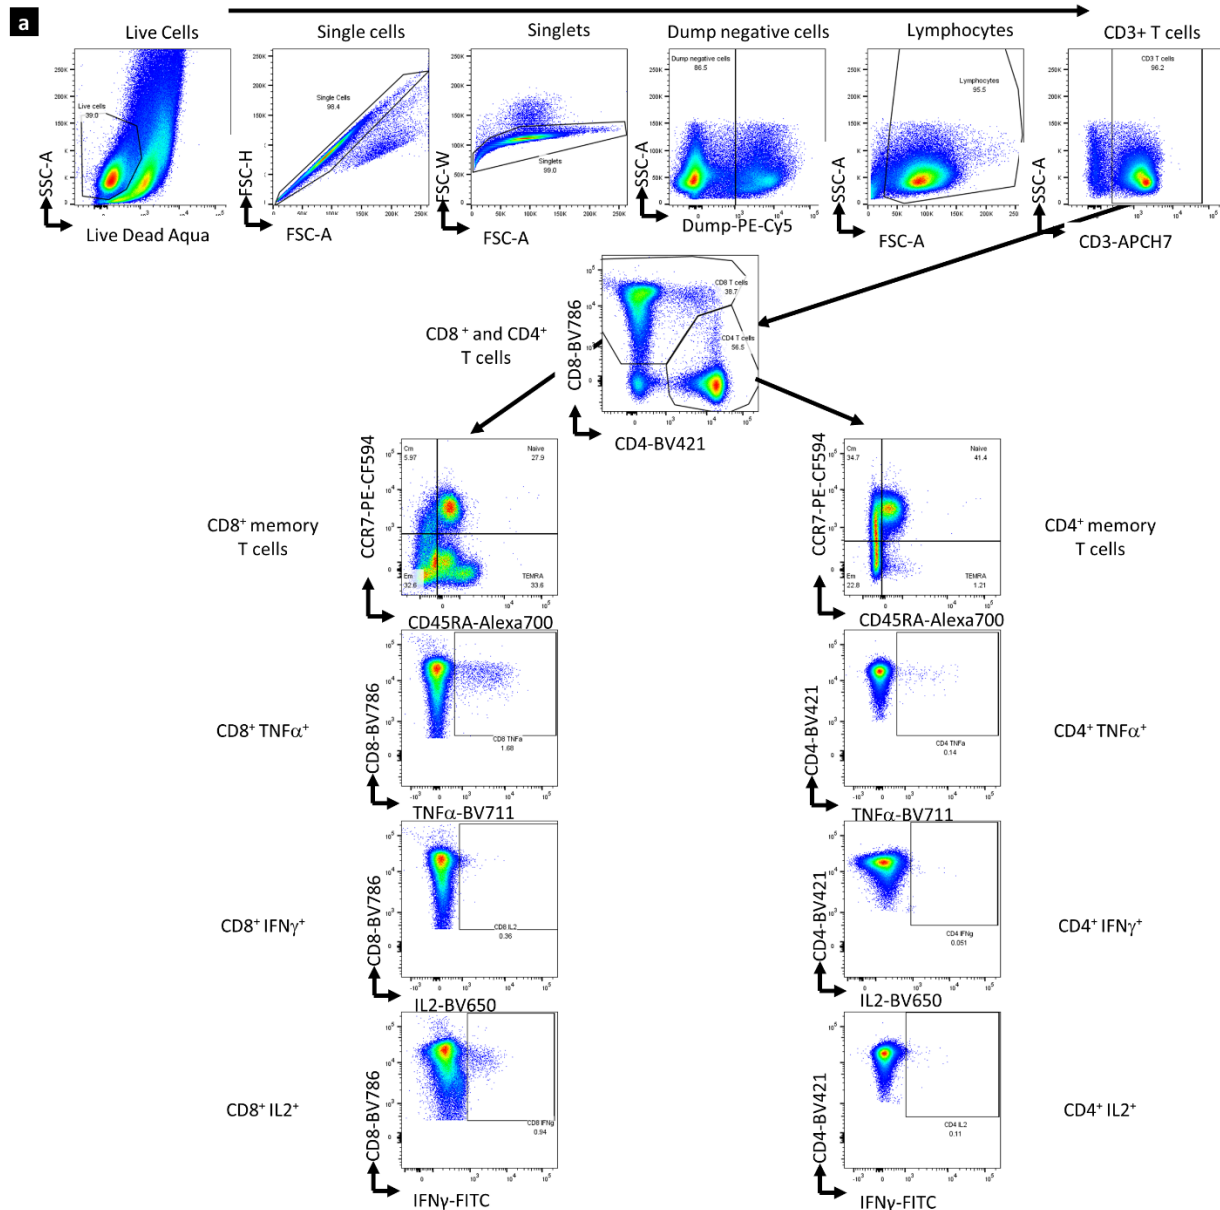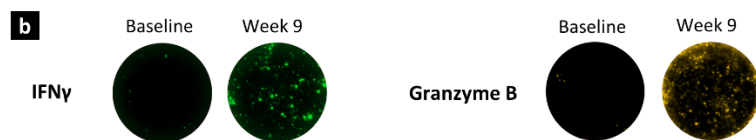

**Supplementary Figure 2: ICS and memory phenotype gating strategy, example flow cytometry scatter plots, and example Fluorospot well images.**

**a**, Gating strategy and example scatter plots for ICS assay and T cell memory phenotype assay for Patient 11. **b**, Example well images for baseline and week 9 PBMC IFN $\gamma$  and Granzyme B Fluorospot assay.
